# Supplementary material for: Human Naa50 Shows Serotonin N-Acetyltransferase Activity, and Its Overexpression Enhances Melatonin Biosynthesis, Resulting in Osmotic Stress Tolerance in Rice
Source: MDPI journal article supplement (doi:10.3390/antiox12020319), 2023-01-30
Supplement: s1 [file s1]

Supplemental Table S1. Sequences of primers used for polymerase chain reaction.

| Gene    | Forward (5'-3')                 | Reverse (5'-3')                   |
|---------|---------------------------------|-----------------------------------|
| hNaa50  | GGCGCGCCATGAAGGGCTCGCGCATC      | GGCGCGCCGGTTGTCCGTCTTCTGGAC       |
| APX1    | CAA GGA GGA GAT ACC CAC CA      | TAG GTG GTC AGA ACC CTT GG        |
| APX4    | TGC ATC TAC GAA ATC TG          | CTT CTT AGA AGC CTC               |
| ABI5    | GAT CAT TTT CCT TGC CGC TAC     | CAA GTG TCA TCT CAC CTA GTG T     |
| CAT2    | CCT ATG CTG ATA CCC AAA G       | CAC ACT GCG ACC AGT AGG A         |
| GR2     | TTA TCC AGG GTA TGG C           | TGG CTT GGA TGA TG                |
| SGT1    | TAC AGG CAC GAC TTC T           | GTA CGG CTC CTC TCC A             |
| SODA1   | ATT CGA TCT TCT GGA ATA ACC     | TGC GTA TTT CCA GTT CAT CA        |
| BIP1    | TGA ACG TGA AGG CTG AGG AC      | GTA GGT CTC GAG CTG GTT GC        |
| BIP4    | CAA GGA GGA GTA CGA GGA GAA G   | CAC ACT TTC GAT CGA ATC CAA AC    |
| CNX     | CGC CGG AGG TCC CGA AGG GAG ACA | CTA GCT TGC ACT GAA CCT CAC AC    |
| PDIC1-1 | ACA AGT GAG TAG GAG AGG GCA TGG | CAA CTT GTC CAG AAC CAC TTC TCT A |
| UBQ5    | CCG ACT ACA ACA TCC AGA AGG AG  | AAC AGG AGC CTA CGC CTA AGC       |
